# Supplementary material
Source: publisher figshare collection journal article supplement (https://sage.figshare.com/ndownloader/files/17513270)
Supplement: Supplementary file 1 [file 17513270]

**Date:**

**Time:**

*Please write about any mealtime experiences, eating/drinking or appetite issues, or other concerns, thoughts or emotions regarding nutrition here.*

**Date:**

**Time:**

*Please write about any mealtime experiences, eating/drinking or appetite issues, or other concerns, thoughts or emotions regarding nutrition here.*
